# Supplementary material for: Paramagnetic dioxovanadium(iv) molecules inside the channels of zeolite BEA – EPR screening of VO2 reactivity toward small gas-phase molecules
Source: Royal Society of Chemistry journal article supplement (doi:10.1039/c6cp01046f), 2016-01-01
Supplement: c6cp01046f1.pdf [file c6cp01046f1.pdf]

*Physical Chemistry Chemical Physics*

Electronic Supplementary Information

**Paramagnetic dioxovanadium(IV) molecules inside the channels of zeolite  
BEA – EPR screen of VO<sub>2</sub> reactivity toward small gas-phase molecules**

Piotr Pietrzyk,<sup>\*a</sup> Kinga Góra-Marek<sup>a</sup>

<sup>a</sup>Faculty of Chemistry, Jagiellonian University, ul. R. Ingardena 3, 30-060 Krakow, POLAND.

E-mail: pietrzyk@chemia.uj.edu.pl

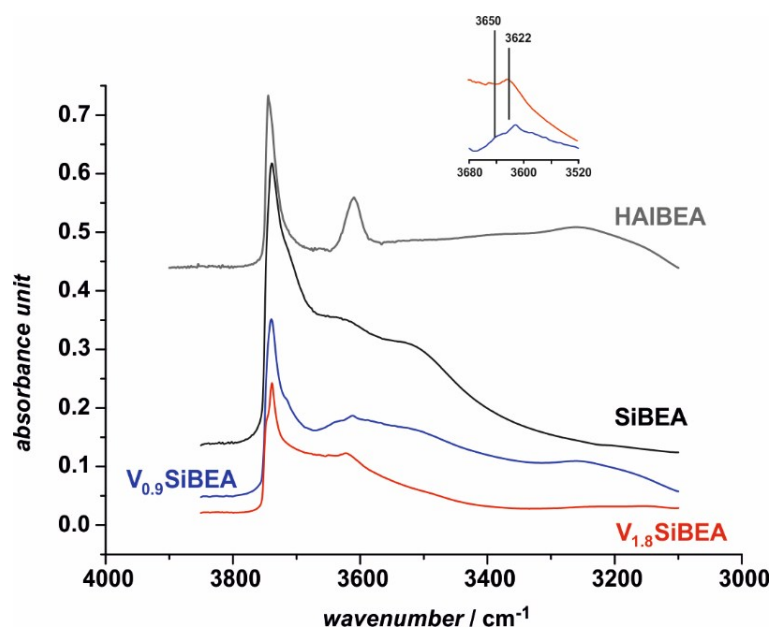

**Figure 1S.** IR spectra of native HAIBEA zeolite sample, dealuminated SiBEA, and vanadium-loaded samples V<sub>0.9</sub>SiBEA and V<sub>1.8</sub>SiBEA.

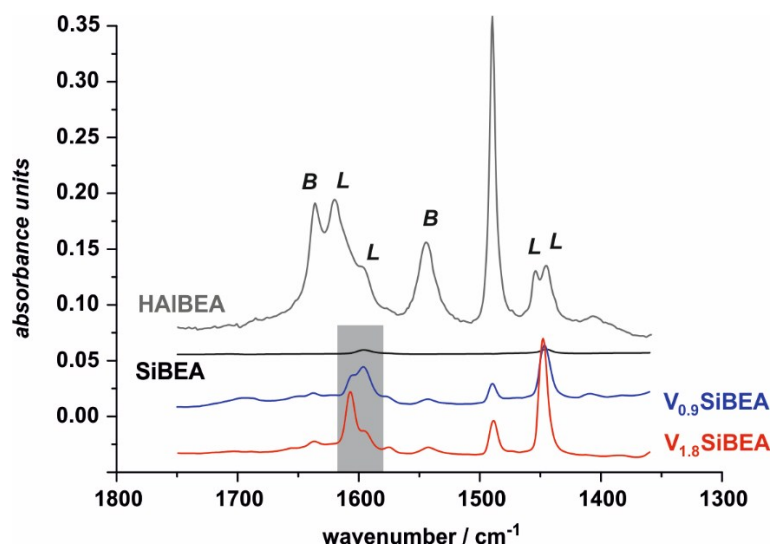

**Figure 2S.** IR spectra of pyridine adsorption on native HAIBEA zeolite sample, dealuminated SiBEA, and vanadium-loaded samples  $V_{0.9}\text{SiBEA}$  and  $V_{1.8}\text{SiBEA}$ . *B* – bands due to Brønsted centers, *L* – bands due to Lewis centers. Highlighted is the spectral region characteristic of vanadium-Py adducts (1607 and 1596  $\text{cm}^{-1}$ ).

**Table 1S.** Concentration of Brønsted and Lewis centers calculated based on IR measurements of pyridine adsorption.

| sample                | Brønsted centers<br>$\mu\text{mol/g}$ | Lewis centers<br>$\mu\text{mol/g}$ |
|-----------------------|---------------------------------------|------------------------------------|
| HBEA                  | 350                                   | 320                                |
| SiBEA                 | 0                                     | 10,2                               |
| $V_{0.9}\text{SiBEA}$ | 36                                    | 159                                |
| $V_{1.8}\text{SiBEA}$ | 37                                    | 346                                |

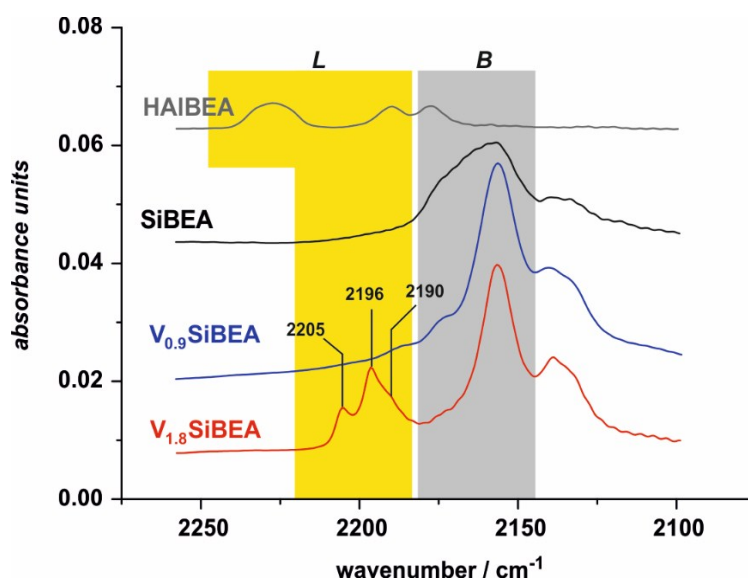

**Figure 3S.** IR spectra of CO adsorption on native HAIBEA zeolite sample, dealuminated SiBEA, and vanadium-loaded samples  $V_{0.9}\text{SiBEA}$  and  $V_{1.8}\text{SiBEA}$ . *B* – bands due to Brønsted centers, *L* – bands due to Lewis centers. Specific bands due to V–CO adducts are designated at 2205, 2196, and 2190  $\text{cm}^{-1}$ .

**Table 2S.** Spin-Hamiltonian parameters of monooxo  $\text{VO}^{2+}$  and dioxo  $\text{VO}_2$  species and oxygen adducts obtained after reaction with  $\text{N}_2\text{O}$  and  $\text{O}_2$  molecules in zeolite SiBEA.

| species                                       | $g_{xx}$ | $g_{yy}$ | $g_{zz}$ | $ A_{xx} /\text{mT}$ | $ A_{yy} /\text{mT}$ | $ A_{zz} /\text{mT}$ |
|-----------------------------------------------|----------|----------|----------|----------------------|----------------------|----------------------|
| $\text{VO}^{2+}/\text{SiBEA}$ [a]             | 1.986    | 1.990    | 1.931    | 7.4                  | 8.3                  | 20.5                 |
| $\text{VO}_2/\text{SiBEA}$ [b]                | 1.803    | 1.942    | 1.968    | 26.9                 | 32.8                 | 31.8                 |
| $\text{O}^--\text{VO}_2^+/\text{SiBEA}$       | 2.0202   | 2.0173   | 2.0284   | 1.65                 | 1.58                 | 1.49                 |
| $\text{O}_2^--\text{VO}_2^+/\text{SiBEA}$ [c] | 2.0054   | 2.0113   | 2.0239   | 0.54                 | 0.68                 | 0.98                 |

[a] absolute signs of *A* tensor taken from previous DFT calculations (ref. 11) are as follows:

$$[-7.4; -8.3; -20.5] / \text{mT}$$

[b] absolute signs of *A* tensor taken from previous DFT calculations (ref. 11) are as follows:

$$[+26.9; +32.8; +31.8] / \text{mT}$$

[c] EPR spectrum of monoclinic symmetry with non-coincidence angle  $\alpha = 16^\circ$  in the *yz* plane,  $g_{xx}$  and  $A_{xx}$  axes are coincident. Taking into account available literature (e.g. J. Phys. Chem. 1988, 92, 1541) for similar superoxo species ( $\text{Co(III)}-\text{O}_2^-$ ), one assumes that all signs should be negative resulting in the following *A* tensor:  $[-0.54; -0.68; -0.98]$ .
